# Supplementary material for: Prognostic Impact of Chronic Vasodilator Therapy in Patients With Vasospastic Angina
Source: PubMed Central journal article supplement — J Am Heart Assoc. 2022 Mar 29;11(7):e023776. doi: 10.1161/JAHA.121.023776 (PMC9075493; doi:10.1161/jaha.121.023776), 2022-03-29
Supplement: JAH3-11-e023776-s001.pdf [file JAH3-11-e023776-s001.pdf]

## **SUPPLEMENTAL MATERIAL**

## **Data S1. METHODS**

### **VA-KOREA Participating Sites and Investigators**

1. Seoul St. Mary's Hospital, The Catholic University of Korea, Seoul, South Korea, Sang Hong Baek

2. Daejeon St. Mary's Hospital, The Catholic University of Korea, Daejeon, South Korea, Sung-Ho Her

(Prof. Sung-Ho Her worked at the Daejeon St. Mary's Hospital during data collection for VA-KOREA registry. However, he moved his job to the St. Vincent Hospital at 2020)

3. Incheon St. Mary's Hospital, The Catholic University of Korea, Incheon, South Korea, Kwan Yong Lee

4. Gil Medical Center, Gachon University, Incheon, South Korea, Seung Hwan Han

5. Korea University Guro Hospital, Korea University, Seoul, South Korea, Seung-Woon Rha

6. Seoul National University Bundang Hospital, Seoul National University, Seongnam, South Korea, Dong-Ju Choi and Jung-Won Suh

7. Samsung Medical Center, Sungkyunkwan University, Seoul, South Korea, Hyeon-Cheol Gwon

8. Gangnam Severance Hospital, Yonsei University, Seoul, South Korea, Hyuck Moon Kwon and Byoung Kwon Lee

9. Busan Paik Hospital, Inje University, Busan, South Korea, Dong-Soo Kim and Tae-Hyun Yang

10. Chonnam National University Hospital, Chonnam National University, Gwangju, South Korea, Youngkeun Ahn and Keun-Ho Park

(Prof. Keun-Ho Park worked at the Chonnam National University Hospital during data collection for VA-KOREA registry. However, he moved his job to the Chosun University Hospital at 2016)

11. Pyeongchon Sacred Heart Hospital, Hallym University, Anyang, South Korea, Sang-Ho Jo

**Table S1** Baseline and Angiographic Characteristics According to Various Vasodilator

|                          | No vasodilator<br>(n = 359) | Vasodilator                                |                                      |                          | p Value† |
|--------------------------|-----------------------------|--------------------------------------------|--------------------------------------|--------------------------|----------|
|                          |                             | Non-nitrate<br>vasodilator*<br>(n = 1,187) | Conventional<br>nitrate<br>(n = 209) | Combination<br>(n = 140) |          |
| Demographics             |                             |                                            |                                      |                          |          |
| Age, years               | 55.6 (11.5)                 | 55.4 (11.2)                                | 52.9 (11.3)                          | 53.8 (11.9)              | 0.012    |
| Male                     | 199 (55.4)                  | 753 (63.4)                                 | 138 (66.0)                           | 81 (57.9)                | 0.018    |
| Medical history          |                             |                                            |                                      |                          |          |
| Ischemic heart disease   | 42 (11.7)                   | 150 (12.6)                                 | 18 (8.6)                             | 26 (18.6)                | 0.049    |
| Stable CAD               | 21 (5.8)                    | 69 (5.8)                                   | 8 (3.8)                              | 16 (11.4)                | 0.028    |
| History of PCI           | 3 (0.8)                     | 28 (2.4)                                   | 3 (1.4)                              | 6 (4.3)                  | 0.077    |
| Hypertension             | 136 (37.9)                  | 448 (37.7)                                 | 86 (41.1)                            | 50 (35.7)                | 0.747    |
| Diabetes mellitus        | 28 (7.8)                    | 117 (9.9)                                  | 20 (9.6)                             | 13 (9.3)                 | 0.710    |
| Dyslipidemia             | 50 (13.9)                   | 188 (15.8)                                 | 40 (19.1)                            | 32 (22.9)                | 0.063    |
| AF or AFL                | 6 (1.7)                     | 10 (0.8)                                   | 1 (0.5)                              | 1 (0.7)                  | 0.439    |
| Cerebrovascular accident | 8 (2.2)                     | 18 (1.5)                                   | 3 (1.4)                              | 3 (2.1)                  | 0.778    |
| Thyroid disease          | 13 (3.6)                    | 45 (3.8)                                   | 1 (0.5)                              | 6 (4.3)                  | 0.097    |
| Hyperthyroidism          | 2 (0.6)                     | 21 (1.8)                                   | 0                                    | 2 (1.4)                  | 0.100    |
| Hypothyroidism           | 9 (2.5)                     | 14 (1.2)                                   | 0                                    | 3 (2.1)                  | 0.064    |

|                         |            |              |            |            |        |
|-------------------------|------------|--------------|------------|------------|--------|
| Chronic airway disease  | 5 (1.4)    | 17 (1.4)     | 3 (1.4)    | 1 (0.7)    | 0.922  |
| Familial history of CAD | 15 (4.2)   | 76 (6.4)     | 15 (7.2)   | 3 (2.1)    | 0.082  |
| Current or ex-smoking   | 136 (37.9) | 484 (40.8)   | 110 (52.6) | 56 (40.0)  | 0.005  |
| Past medication         |            |              |            |            |        |
| Aspirin                 | 66 (18.4)  | 257 (21.7)   | 34 (16.3)  | 27 (19.3)  | 0.226  |
| Thienopyridine          | 15 (4.2)   | 34 (2.9)     | 13 (6.2)   | 8 (5.7)    | 0.048  |
| Calcium-channel blocker | 50 (13.9)  | 248 (20.9)   | 31 (14.8)  | 38 (27.1)  | 0.001  |
| ACE inhibitor or ARB    | 69 (19.2)  | 213 (17.9)   | 30 (14.4)  | 19 (13.6)  | 0.280  |
| Beta-blocker            | 36 (10.0)  | 92 (7.8)     | 9 (4.3)    | 8 (5.7)    | 0.074  |
| Statin                  | 49 (13.6)  | 200 (16.8)   | 25 (12.0)  | 17 (12.1)  | 0.121  |
| Initial presentation    |            |              |            |            |        |
| Chest pain              | 318 (88.6) | 1,095 (92.2) | 196 (93.8) | 131 (93.6) | 0.073  |
| Angina class >2         | 252 (70.2) | 752 (63.4)   | 176 (84.2) | 104 (74.3) | <0.001 |
| Dyspnea                 | 23 (6.4)   | 77 (6.5)     | 5 (2.4)    | 5 (3.6)    | 0.073  |
| Syncope                 | 7 (1.9)    | 12 (1.0)     | 4 (1.9)    | 1 (0.7)    | 0.391  |
| Cardiac arrest          | 10 (2.8)   | 7 (0.6)      | 5 (2.4)    | 5 (3.6)    | 0.001  |
| VT or VF                | 6 (1.7)    | 4 (0.3)      | 1 (0.5)    | 1 (0.7)    | 0.048  |
| STE during chest pain   | 15 (4.2)   | 58 (4.9)     | 19 (9.1)   | 13 (9.3)   | 0.012  |
| STD during chest pain   | 4 (1.1)    | 6 (0.5)      | 4 (1.9)    | 3 (2.1)    | 0.068  |
| TWI during chest pain   | 7 (1.9)    | 22 (1.9)     | 12 (5.7)   | 6 (4.3)    | 0.004  |

|                         |            |            |            |           |        |
|-------------------------|------------|------------|------------|-----------|--------|
| Fixed stenosis          | 136 (37.9) | 409 (34.5) | 76 (36.4)  | 50 (35.7) | 0.678  |
| Left main               | 3 (0.8)    | 12 (1.0)   | 3 (1.4)    | 2 (1.4)   | 0.882  |
| LAD or diagonal         | 100 (27.9) | 280 (23.6) | 50 (23.9)  | 38 (27.1) | 0.358  |
| LCX or OM               | 37 (10.3)  | 119 (10.0) | 23 (11.0)  | 15 (10.7) | 0.973  |
| RCA                     | 61 (17.0)  | 209 (17.6) | 43 (20.6)  | 20 (14.3) | 0.488  |
| Significant stenosis‡   | 20 (5.6)   | 47 (4.0)   | 7 (3.3)    | 5 (3.6)   | 0.499  |
| LAD or diagonal         | 13 (3.6)   | 28 (2.4)   | 4 (1.9)    | 4 (2.9)   | 0.535  |
| LCX or OM               | 2 (0.6)    | 10 (0.8)   | 2 (1.0)    | 1 (0.7)   | 0.946  |
| RCA                     | 7 (1.9)    | 14 (1.2)   | 2 (1.0)    | 0         | 0.325  |
| Other finding           |            |            |            |           |        |
| Myocardial bridge       | 13 (3.6)   | 82 (6.9)   | 20 (9.6)   | 8 (5.7)   | 0.035  |
| Slow flow               | 12 (3.3)   | 67 (5.6)   | 10 (4.8)   | 9 (6.4)   | 0.320  |
| Spasm provocation test  |            |            |            |           |        |
| Spasm positive arteries |            |            |            |           |        |
| Left main               | 1 (0.3)    | 9 (0.8)    | 0          | 8 (5.7)   | <0.001 |
| LAD or diagonal         | 178 (49.6) | 573 (48.3) | 106 (50.7) | 80 (57.1) | 0.250  |
| LCX or OM               | 101 (28.1) | 273 (23.0) | 38 (18.2)  | 35 (25.0) | 0.048  |
| RCA                     | 192 (53.5) | 593 (50.0) | 116 (55.5) | 64 (45.7) | 0.199  |
| Multivessel spasm       | 103 (28.7) | 280 (23.6) | 44 (21.1)  | 38 (27.1) | 0.121  |
| Spontaneous spasm       | 49 (13.6)  | 175 (14.7) | 24 (11.5)  | 28 (20.0) | 0.158  |

|                            |            |              |            |            |        |
|----------------------------|------------|--------------|------------|------------|--------|
| Diffuse spasm              | 234 (65.2) | 755 (63.6)   | 120 (57.4) | 76 (54.3)  | 0.045  |
| Focal spasm                | 134 (37.3) | 427 (36.0)   | 102 (48.8) | 67 (47.9)  | <0.001 |
| Mixed spasm                | 41 (11.4)  | 111 (9.4)    | 13 (6.2)   | 5 (3.6)    | 0.021  |
| Spasm on fixed stenosis    | 77 (21.4)  | 248 (20.9)   | 56 (26.8)  | 36 (25.7)  | 0.184  |
| Chest pain during spasm    | 207 (57.7) | 692 (58.3)   | 149 (71.3) | 93 (66.4)  | 0.001  |
| Result of provocation test |            |              |            |            | 0.806  |
| Definite positive          | 132 (36.8) | 459 (38.7)   | 81 (38.8)  | 58 (41.4)  |        |
| Intermediate positive      | 227 (63.2) | 728 (61.3)   | 128 (61.2) | 82 (58.6)  |        |
| ECG change                 |            |              |            |            |        |
| STE                        | 29 (8.1)   | 99 (8.3)     | 15 (7.2)   | 14 (10.0)  | 0.824  |
| STD                        | 16 (4.5)   | 48 (4.0)     | 11 (5.3)   | 6 (4.3)    | 0.877  |
| TWI                        | 15 (4.2)   | 55 (4.6)     | 11 (5.3)   | 11 (7.9)   | 0.349  |
| Medication at discharge    |            |              |            |            |        |
| Calcium-channel blocker    | 301 (83.8) | 1,088 (91.7) | 191 (91.4) | 125 (89.3) | <0.001 |
| ACE inhibitor or ARB       | 68 (18.9)  | 218 (18.4)   | 32 (15.3)  | 21 (15.0)  | 0.533  |
| Antiplatelet               | 166 (46.2) | 558 (47.0)   | 96 (45.9)  | 61 (43.6)  | 0.886  |
| Statin                     | 161 (44.8) | 592 (49.9)   | 97 (46.4)  | 66 (47.1)  | 0.353  |
| Beta-blocker               | 21 (5.8)   | 86 (7.2)     | 6 (2.9)    | 8 (5.7)    | 0.109  |
| Alpha blocker              | 5 (1.4)    | 15 (1.3)     | 0          | 2 (1.4)    | 0.420  |

Values are expressed as mean (SD) or n (%). \*Non-nitrate vasodilator includes nicorandil, molsidomine and trimetazidine. †The p Values are derived from the chi-square test for categorical variables, when appropriate, and from one-way analysis of variance F-test or Kruskal-Wallis test for continuous variables for between-group comparison. ‡There was no significantly fixed coronary artery stenosis in left main.

ACE = angiotensin-converting enzyme; AF = atrial fibrillation; AFL = atrial flutter; ARB = angiotensin II receptor blocker; CAD = coronary artery disease; ECG = electrocardiography; LAD = left anterior descending artery; LCX = left circumflex artery; LVEF = left ventricular ejection fraction; OM = obtuse marginal; PCI = percutaneous coronary intervention; RCA = right coronary artery; SMD = standardized mean difference; STD = ST-segment depression; STE = ST-segment elevation; TWI = T-wave inversion; VF = ventricular fibrillation; VT = ventricular tachycardia.



**Table S2 Detailed Characteristics of the VSA Patients With All-Cause Deaths**

|     | Sex    | Age (yrs) | JCSA score | DL  | AF or AFL | Smoking | Significant fixed stenosis | ERGT positive type | Spasm type | MS  | Involved vessel | Medication Change | Time to death (days) |
|-----|--------|-----------|------------|-----|-----------|---------|----------------------------|--------------------|------------|-----|-----------------|-------------------|----------------------|
| 1   | Female | 77        | 5          | Yes | No        | Yes     | No                         | Definite           | Mixed      | Yes | LAD, LCX        | Yes               | 242                  |
| 2   | Female | 72        | 3          | No  | No        | Yes     | No                         | Definite           | Diffuse    | No  | RCA             | No                | 259                  |
| 3   | Male   | 65        | 6          | No  | No        | Yes     | No                         | Definite           | Diffuse    | No  | LAD             | Yes               | 570                  |
| 4   | Male   | 46        | 8          | No  | No        | Yes     | No                         | Definite           | Diffuse    | No  | RCA             | No                | 572                  |
| 5*  | Male   | 61        | 4          | Yes | No        | Yes     | No                         | Definite           | Diffuse    | Yes | LAD/RCA         | No                | 169                  |
| 6   | Female | 60        | 9          | No  | No        | No      | No                         | Intermediate       | Diffuse    | Yes | LAD/RCA         | No                | 439                  |
| 7*  | Male   | 45        | 2          | No  | No        | Yes     | No                         | Definite           | Mixed      | No  | RCA             | No                | 19                   |
| 8   | Male   | 55        | 2          | No  | No        | Yes     | No                         | Definite           | Diffuse    | No  | LAD             | No                | 418                  |
| 9*  | Male   | 56        | 2          | No  | No        | Yes     | No                         | Definite           | Focal      | No  | RCA             | Yes               | 119                  |
| 10* | Male   | 60        | 2          | No  | No        | No      | No                         | Definite           | Focal      | No  | RCA             | Yes               | 529                  |
| 11  | Female | 60        | 0          | No  | No        | No      | No                         | Intermediate       | Diffuse    | No  | LAD             | Yes               | 173                  |
| 12  | Female | 68        | 2          | No  | No        | No      | No                         | Intermediate       | Diffuse    | Yes | LAD, LCX        | No                | 858                  |
| 13  | Female | 62        | 2          | Yes | No        | Yes     | No                         | Intermediate       | Diffuse    | No  | LCX             | No                | 1,280                |

\*Cardiac death.

AF = atrial fibrillation; AFL = atrial flutter; DL = dyslipidemia; JCSA = Japanese Coronary Spasm Association; LVEF = left ventricular ejection fraction; MS = multivessel spasm.

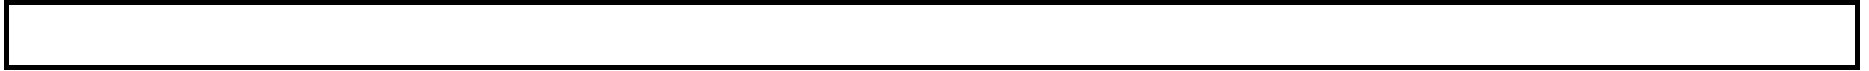

**Table S3 Independent Predictors for Primary Endpoint or Acute Coronary Syndrome**

|                                                                                                                                                                                                                                          | <b>Hazard Ratio</b> | <b>95% Confidence Interval</b> | <b>p Value*</b> |
|------------------------------------------------------------------------------------------------------------------------------------------------------------------------------------------------------------------------------------------|---------------------|--------------------------------|-----------------|
| <b>Primary endpoint*</b>                                                                                                                                                                                                                 |                     |                                |                 |
| Non-nitrate vasodilator (no vasodilator group as a reference)                                                                                                                                                                            | 0.74                | 0.42-1.31                      | 0.301           |
| Conventional nitrate (no vasodilator group as a reference)                                                                                                                                                                               | 1.25                | 0.61-2.56                      | 0.539           |
| Combination (no vasodilator group as a reference)                                                                                                                                                                                        | 1.48                | 0.69-3.18                      | 0.320           |
| Atrial fibrillation or flutter                                                                                                                                                                                                           | 3.22                | 1.13-9.19                      | 0.029           |
| Significantly fixed coronary artery stenosis†                                                                                                                                                                                            | 2.58                | 1.33-4.99                      | 0.005           |
| <b>ACS</b>                                                                                                                                                                                                                               |                     |                                |                 |
| Non-nitrate vasodilator (no vasodilator group as a reference)                                                                                                                                                                            | 0.92                | 0.40-2.11                      | 0.842           |
| Conventional nitrate (no vasodilator group as a reference)                                                                                                                                                                               | 2.31                | 0.91-5.86                      | 0.077           |
| Combination (no vasodilator group as a reference)                                                                                                                                                                                        | 3.18                | 1.22-8.28                      | 0.018           |
| Dyslipidemia                                                                                                                                                                                                                             | 1.89                | 1.05-3.38                      | 0.033           |
| Atrial fibrillation or flutter                                                                                                                                                                                                           | 4.91                | 1.45-16.70                     | 0.011           |
| Significantly fixed coronary artery stenosis                                                                                                                                                                                             | 3.04                | 1.33-6.98                      | 0.009           |
| *The primary endpoint was a composite of cardiac death, acute coronary syndrome, and new-onset arrhythmia. †The definition was more than 50% diameter stenosis in left main and more than 70% stenosis in non-left main coronary artery. |                     |                                |                 |
| ACS= acute coronary syndrome.                                                                                                                                                                                                            |                     |                                |                 |

**Figure S1 Absolute Standardized Difference for Multinomial Propensity Score**

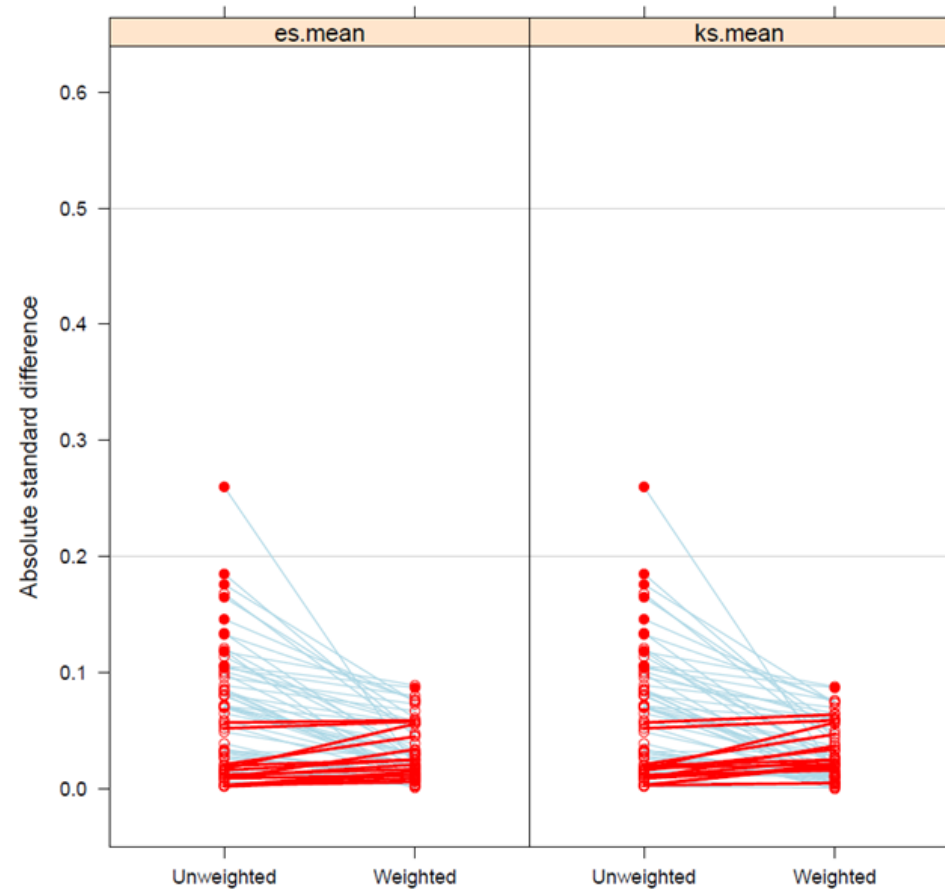

Standardized effect size plot for estimating the propensity scores. ES = effect size; KS = Kolmogorov-Smirnov.
